# Supplementary material for: Gold nanoparticles bearing a clinically used non-antibiotic drug for combating multi-drug resistant bacteria
Source: Royal Society of Chemistry journal article supplement (doi:10.1039/d2cc03460c), 2022-01-01
Supplement: d2cc03460c1.pdf [file d2cc03460c1.pdf]

## Supporting Information

### Gold Nanoparticles Bearing a Clinically Used None-antibiotic Drug for Combating Multi-drug Resistant Bacteria

*Yuexiao Jia,<sup>1</sup> Jiangjiang Zhang,<sup>1</sup> Yingcan Zhao,<sup>1</sup> Ruihua Dong,<sup>1</sup> Hui Wang<sup>2</sup> and Xingyu Jiang<sup>1\*</sup>*

<sup>1</sup> Guangdong Provincial Key Laboratory of Advanced Biomaterials, Shenzhen Key Laboratory of Smart Healthcare Engineering, Department of Biomedical Engineering, Southern University of Science and Technology, No. 1088, Xueyuan Rd., Xili, Nanshan District, Shenzhen, Guangdong, 518055, P. R. China.

<sup>2</sup> Department of Clinical Laboratory, Peking University People's Hospital, Beijing 100044, P. R. China.

\* Correspondence: [jiang@sustech.edu.cn](mailto:jiang@sustech.edu.cn)

#### Experimental Procedures

##### Materials

HAuCl<sub>4</sub>·3H<sub>2</sub>O (99.99%), N-Acetyl-L-cysteine (NAC), cysteine, NaBH<sub>4</sub>, glutaraldehyde, ethanol, osmic acid, uranyl acetate, lead citrate and all antibiotics were from Sigma. CCK-8, ATP, BCA protein, ROS assay kits were from Beyotime Institute of Biotechnology, China. Propidium iodide (PI) and DiSC<sub>3</sub>(5) were from Invitrogen Molecular Probes, Inc. Hematoxylin and eosin (H&E staining) and masson were from Beijing Bioss Biotechnology Co. LTD., China. PBS buffer, Luria-Bertani (LB) medium, Dulbecco's modified Eagle medium (DMEM) were from Solarbio life science, China.

## Bacterial strains

Standard strains of *E. coli* (*Escherichia coli* (Migula) Castellani and Chalmers 11775<sup>TM</sup>), *P. aeruginosa* (*Pseudomonas aeruginosa* (Schroeter) Migula27853) and *K. pneumonia* (*Klebsiella pneumoniae* subsp. *pneumoniae* (Schroeter) Trevisan13883) were from Genetimes Technology, Inc. Clinical MDR isolates, carbapenem-resistant *E. coli* (CR *E. coli*), and *K. pneumoniae* (CR *K. pneumoniae*), polymyxin-resistant *E. coli* (PR *E. coli*) and *K. pneumoniae* (PR *K. pneumoniae*) were from local hospitals. We cultured bacteria in LB medium at 37 °C on a shaking bed at 220 rpm.

## Synthesis of Gold nanoparticles

For the synthesis of Au\_NAC nanoparticles, we mixed the aqueous solution of 5 mL HAuCl<sub>4</sub>·3H<sub>2</sub>O (5 mM) and 5 mL NAC (20 mM), stirred the solution for 10 min in the ice-water bath, and added the aqueous solution of 2.5 mL NaBH<sub>4</sub> (80 mM) dropwise. After an hour of gentle stirring, we purified NPs by dialysis (14 kDa MW cutoff) in deionized water for above 24 h and filtration by filters (0.22 μm). We optimized the synthesis parameters by changing the concentration of NAC (2.5, 5, 10, 20, 40, 80 mM) and NaBH<sub>4</sub> (20, 40, 80, 160, 320 mM).<sup>1</sup> For the synthesis of gold nanoparticles capped with NAC and stabilized with Tween 80 (Au\_NAC\_Tween), we mixed the aqueous solution of 5 mL HAuCl<sub>4</sub>·3H<sub>2</sub>O (5 mM), 5 mL NAC (20 mM), and 20 mg tween 80, stirred the solution for 10 min in the ice-water bath, and added the aqueous solution of 2.5 mL NaBH<sub>4</sub> (80 mM) dropwise. After an hour of gentle stirring, we purified NPs by dialysis (14 kDa MW cutoff) in deionized water for above 24 h and filtration by filters (0.22 μm). For the synthesis of Au NPs, we mixed the aqueous solution of 5 mL HAuCl<sub>4</sub>·3H<sub>2</sub>O (5 mM), 5 mL H<sub>2</sub>O, and 20 mg Tween 80 (final concentration of 2 mg/mL), stirred the solution for 10 min in the ice-water bath, and added the aqueous solution of 2.5 mL NaBH<sub>4</sub> (40 mM) dropwise. After an hour of gentle stirring, we purified NPs by dialysis (14 kDa MW cutoff) in deionized water for above 24 h and filtration by filters (0.22 μm). For the synthesis of gold nanoparticles capped with cysteine (Au\_C), we mixed the aqueous solution of 5 mL HAuCl<sub>4</sub>·3H<sub>2</sub>O (5 mM), 5 mL cysteine (20 mM), and 20 mg Tween 80, stirred the solution for 10 min in the ice-water bath, and added the aqueous solution of 2.5 mL NaBH<sub>4</sub> (40 mM) dropwise. After an hour of gentle stirring, we purified NPs by dialysis (14 kDa MW cutoff) in deionized water for above 24 h and filtration by filters (0.22 μm).

### **Characterization of Au\_NAC**

We determined the mass concentration of Au\_NAC with inductively coupled plasma optical emission spectrometer (ICP-OES, Normal School of Beijing Elmer Optima 5300DV). We observed morphologies of NPs with transmission electron microscope (TEM, Tecnai G2 20 ST). We determined UV-vis absorption of the Au\_NAC NPs solution with Daojin ultraviolet-visible spectrophotometer (UV-vis) and tested Zeta potential with Malvern Zetasizer Nano ZS. We analyzed elemental contents of the Au\_NAC NPs through X-ray photoelectron spectroscopy (XPS, ESCALAB250Xi, Thermo Fisher).<sup>1-4</sup>

### **Minimum inhibitory concentration (MIC)**

We determined the MIC using a microbroth dilution method according to CLSI guidelines.<sup>5</sup> We diluted the logarithmic-phase bacteria ( $OD_{600} \approx 0.1$ ) with LB medium for a thousand folds. We added 100  $\mu$ L of LB medium in every well of 96-well plate and then added 100  $\mu$ L Au\_NAC solution in the first well of each row. Au\_NAC was diluted logarithmically in every row. We added 10  $\mu$ L of bacterial suspension into each well with 100  $\mu$ L of different concentrations of Au\_NAC solutions. The plates were incubated in incubator at 37 °C for 24 h. MIC is the minimal concentration at which no bacterial turbid is observed in all three parallels after 24 h incubation at 37 °C.<sup>6</sup> We evaluated the stability of Au\_NAC. We stored Au\_NAC solution in refrigerator at 4 °C for different times (1, 3, 5, 8, 15 months) and tested the MICs. We also stored Au\_NAC powder after lyophilization at -20 °C for 1, 11, 25, 28 months and tested the MICs.

### **Morphological changes of *E. coli* treated with Au\_NAC**

We incubated *E. coli* with Au\_NAC for 12 h and 24 h, fixed the bacteria for 3 h with 2.5% glutaraldehyde, and washed them with PBS. We dehydrated the samples by gradient ethanol solutions (30, 50, 70, 90, 95, 100%, v/v, in water) and dried them at room temperature. The group without Au\_NAC was set as control. We used SEM to record the images. After 12 and 24 hours of treatment of *E. coli* with Au\_NAC at 37 °C, we fixed the bacteria with 2.5 % glutaraldehyde and 0.1 % osmic acid, dehydrated with graded ethanol, and further cut superthin slices and stained the slices with 2% uranyl acetate and 0.2 % lead citrate. The group without Au\_NAC was set as control. We used TEM to record the images.<sup>7</sup>

### **Membrane proton motive force (PMF) of *E. coli***

*E. coli* was incubated with 4  $\mu\text{M}$  DiSC<sub>3</sub>(5) for 1 h, ion-equilibrated with 100 mM KCl, then treated with Au\_NAC for 1 h and the fluorescence was monitored with excitation at 622 nm and emission at 670 nm by Tecan infinite 200 microplate reader. The group without Au\_NAC was a control.<sup>8</sup>

### **Intracellular ATP levels of *E. coli***

*E. coli* was treated with Au\_NAC for 1 h. We collected the bacteria and detected intracellular ATP levels by an ATP assay kit. We lysed them with lysis buffer and centrifuged them at 12000 rpm for 5 min. The supernatant was divided into two parts. We added ATP-detecting solution to one part of the supernatant and immediately determine the luminescence with the Tecan infinite 200 microplate reader. The amount of protein in the other part of supernatant was detected by BCA protein assay kit. We corrected the ATP levels for different samples to nM/mg. The group without Au\_NAC was set as control.<sup>9</sup>

### **Membrane permeability assay**

We treated *E. coli* with Au\_NAC for 12 and 24 h at 37 °C, and washed them with PBS. We stained the bacteria with PI (200  $\mu\text{M}$ ) for 30 min. The group without Au\_NAC was set as control. We used confocal laser scanning microscope (CLSM, Olympus, FV1000-IX81) to record the fluorescent images.<sup>10</sup>

### **ROS productions**

We tested the total ROS productions using Total Reactive Oxygen Species Test Kit. We stained the *E. coli* cells by stain solution for 30 min at 37 °C. Then the bacteria were washed and treated with Au\_NAC for 1 h. The fluorescence was monitored with excitation at 488 nm and emission at 535 nm by Tecan infinite 200 microplate reader. The group without Au\_NAC was set as control.<sup>11</sup>

### **Cytotoxicity of Au\_NAC**

We tested the cytotoxicity of Au\_NAC using CCK-f8. HUVEC cells were cultured in DMEM for 24 h in a 96-well plate. We added different concentration of Au\_NAC for 24 h. We discarded the supernatant and added 10 % (v/v) of the CCK-8 solution and incubated the sample at 37 °C for 2 h. We determined the absorbance at 450 nm using Tecan infinite 200 multimode microplate readers.

### **Hemolysis of Au\_NAC**

In hemolysis assay, human whole blood was centrifuged at 1200 r/min for 15 min. The supernatant was discarded, and physiological saline was used to wash RBCs three times, and to resuspend RBCs. Then we incubated RBCs (final concentration of 4 %) with different concentration of Au\_NAC. H<sub>2</sub>O was used as positive control and physiological saline was used as negative control. All samples were prepared in triplicates. After 3 h-incubation, we centrifuged them at 1200 r/min for 15 min, took pictures and analyzed the supernatant by UV-vis spectroscopy (Shimazu Spectrophotometer) at 540 nm.

### ***In vivo* toxicity of Au\_NAC**

Balb/c mice (female 6-8 week) were bought from VITAL RIVER, Inc. We did a dose tolerance study of Au\_NAC. Mice (six per group) were administered via a single intravenous dose of Au\_NAC (0, 2.5, 5, 10, 20 and 40 mg/kg). Survival rates were monitored daily for 3 weeks. We investigated the distribution of Au\_NAC in major organs. Mice were administered via an intravenous administration of Au\_NAC (10 mg/kg) and sacrificed after 1, 4, 8, 24, and 36 h to obtain the major organs. The organs were weighed and dissolved using aqua regia for distribution studies. ICP-MS was used to measure the quantity of Au in organs. The experiments followed the relevant laws/institutional guidelines and were approved by the Institutional Animal Care and Use Committee, Southern University of Science and Technology (SUSTC-JY2019149).

### ***In vivo* efficacy**

We built a MDR bacterial wound infection model to test the *in vivo* efficacy of Au\_NAC. We prepared full-thickness wounds with diameters of 2 cm on the dorsal side of Wistar rats (8 week). The wounds were infected by 200  $\mu$ L CR *E. coli* ( $10^9$  CFU/mL) for 30 min. We treated the infected wounds with gauze (control) and Au\_NAC infiltrated gauze (Au\_NAC). We monitored the wound healing progress in the control and Au\_NAC groups and take photographs of the wounds at 0, 7, and 14 days. We collected the wound tissues and cultured the suspensions of grinded tissues on LB plates. We obtained the isometric continuum cut sections of each wound and stain them with H&E or Masson.<sup>12</sup> The experiments followed the relevant laws/institutional guidelines and were approved by the Institutional Animal Care and Use Committee, Institute of Process Engineering, Chinese Academy of Sciences (IPEAECA2018032).

## Supporting Discussion

We compare the antibacterial activities of Au\_NAC with Au NPs or Au\_C (Table S1). Au NPs does not have antibacterial activity and its MICs are  $>3000 \mu\text{g/mL}$ . Gold nanoparticles capped with cysteine (Au\_C), a derivative of NAC, does not show antibacterial activity. In contrast, when the gold nanoparticles are capped with NAC, the conjugates show excellent antibacterial activities against Gram-negative bacteria. To investigate the influence of Tween 80 on the antibacterial activities of gold nanoparticles, we synthesize NAC-capped gold nanoparticles stabilized with Tween 80 (Au\_NAC\_Tween) and test the antibacterial activities of Au\_NAC\_Tween. Au\_NAC\_Tween shows equivalent antibacterial activities against Gram-negative bacteria. Tween 80 does not influence the antibacterial activities of gold nanoparticles. We characterize Au NPs, Au\_C, and Au\_NAC\_Tween nanoparticles. They possess similar particle sizes of  $2.03 \pm 0.56 \text{ nm}$ ,  $1.83 \pm 0.47 \text{ nm}$ , and  $1.85 \pm 0.50 \text{ nm}$ . Their zeta potentials are  $-15.8 \pm 0.8 \text{ mV}$ ,  $-34.4 \pm 2.2 \text{ mV}$ , and  $-33.2 \pm 4.5 \text{ mV}$ . Au\_NAC or Au\_NAC\_Tween have similar sizes and charges to Au\_C, but they possess different antibacterial activities. So the presence of NAC is important for Au\_NAC to exert antibacterial activities.

We evaluate the biocompatibility of Au\_NAC before evaluating the *in vivo* efficacy. We test their effects on the viability of human umbilical vein endothelial cells (HUVECs). Au\_NAC can keep 96.4 % cell viability at  $64 \mu\text{g/mL}$ . Even at  $128 \mu\text{g/mL}$ , 82.7 % HUVECs cells are alive after 24-h treatment (Figure S6). So the cytotoxicity of Au\_NAC is acceptable. We carry out a hemolysis assay of Au\_NAC and the results do not show obvious hemolysis for human erythrocytes even when the concentration of Au\_NAC is  $128 \mu\text{g/mL}$  (Figure S7). We also carry out a dose tolerance test to evaluate the *in vivo* toxicity of Au\_NAC. Mice are challenged with a single intravenous dose of

Au\_NAC and monitored for three weeks. We calculate the survival of mice and Au\_NAC do not cause toxicity to mice even at 40 mg/kg (Figure S8). The low toxicity gives us confidence to develop Au\_NAC as an antibacterial agent. We evaluate the distribution of Au\_NAC in major organs (Figure S10). After an intravenous administration of Au\_NAC (10 mg/kg), the Au levels in major organs are measured by ICP-MS. The results show that liver and spleen accumulate higher concentration of Au\_NAC. So we think Au\_NAC was likely metabolized via liver and spleen.

**Table S1** Antibacterial activities of Au\_NAC indicated by the MICs of Au+NAC, Au and NAC. Antibacterial activities of Au\_NAC\_Tween, Au NPs, and Au\_C.

| Organism                | Au_NAC |    |      | Au_NAC_Tween | Au NPs | Au_C  |
|-------------------------|--------|----|------|--------------|--------|-------|
|                         | Au+NAC | Au | NAC  |              |        |       |
| <i>E. coli</i>          | 7.5    | 4  | 3.5  | 7            | >3000  | >3000 |
| CR <i>E. coli</i>       | 15     | 8  | 7    | 14           | >3000  | >3000 |
| PR <i>E. coli</i>       | 3.75   | 2  | 1.75 | 3.5          | >3000  | >3000 |
| <i>K. pneumoniae</i>    | 7.5    | 4  | 3.5  | 7            | >3000  | >3000 |
| CR <i>K. pneumoniae</i> | 7.5    | 4  | 3.5  | 7            | >3000  | >3000 |
| PR <i>K. pneumoniae</i> | 15     | 8  | 7    | 14           | >3000  | >3000 |
| <i>P. aeruginosa</i>    | 15     | 8  | 7    | 14           | >3000  | >3000 |

CR, carbapenem-resistant, PR, polymyxin-resistant, MIC, minimum inhibitory concentration ( $\mu\text{g/mL}$ ). Au+NAC is the MICs of Au\_NAC based on the total concentration of Au and NAC.

**Table S2** Antibacterial activities of Au\_NAC NPs with different ratio of Au and NAC or NaBH<sub>4</sub> indicated by MICs.

| Organism                | Au: NaBH <sub>4</sub> (1:X) |      |      |    |     |      | Au: NAC (1:Y) |      |    |      |      |      |
|-------------------------|-----------------------------|------|------|----|-----|------|---------------|------|----|------|------|------|
|                         | 2                           | 4    | 8    | 12 | 16  | 24   | 0.5           | 1    | 2  | 4    | 8    | 16   |
| <i>E. coli</i>          | >128                        | 9.5  | 7.5  | 14 | 25  | >128 | >128          | 64   | 44 | 7.5  | 18   | >128 |
| CR <i>E. coli</i>       | >128                        | 9.5  | 15   | 14 | 25  | >128 | >128          | 64   | 22 | 15   | 18   | >128 |
| PR <i>E. coli</i>       | >128                        | 19   | 3.75 | 14 | 25  | >128 | >128          | 16   | 22 | 3.75 | 36   | >128 |
| <i>K. pneumoniae</i>    | >128                        | 9.5  | 7.5  | 28 | 50  | >128 | >128          | >128 | 22 | 7.5  | 18   | >128 |
| CR <i>K. pneumoniae</i> | >128                        | >128 | 7.5  | 56 | 100 | >128 | >128          | 16   | 11 | 7.5  | 18   | >128 |
| PR <i>K. pneumoniae</i> | >128                        | 19   | 15   | 28 | 50  | >128 | >128          | 32   | 22 | 15   | 36   | >128 |
| <i>P. aeruginosa</i>    | >128                        | >128 | 15   | 28 | 50  | >128 | >128          | 32   | 22 | 15   | >128 | >128 |

CR, carbapenem-resistant, PR, polymyxin-resistant, MIC, minimum inhibitory concentration ( $\mu\text{g/mL}$ ). X is the molar ratio of NaBH<sub>4</sub> to Au. Y is the molar ratio of NAC to Au.

**Table S3.** Antimicrobial susceptibilities of Gram-negative bacteria indicated with MICs.

| Organism                | Antibiotics |          |             |            |            |             |
|-------------------------|-------------|----------|-------------|------------|------------|-------------|
|                         | Penicillin  | Imipenem | Levofloxaci | Cefotaxime | Gentamicin | Polymyxin E |
| <i>E. coli</i>          | 4           | 2        | <0.06       | 8          | <0.06      | 0.5         |
| CR <i>E. coli</i>       | >128        | 32       | 32          | >128       | >128       | 4           |
| PR <i>E. coli</i>       | >128        | >128     | >128        | 0.125      | <0.06      | 32          |
| <i>K. pneumoniae</i>    | 4           | 8        | 0.13        | 2          | 0.13       | 2           |
| CR <i>K. pneumoniae</i> | >128        | >128     | 64          | 64         | >128       | 2           |
| PR <i>K. pneumoniae</i> | >128        | >128     | 0.25        | <0.06      | >128       | 64          |
| <i>P. aeruginosa</i>    | 8           | 8        | 2           | 4          | 8          | 1           |

CR, carbapenem-resistant, PR, polymyxin-resistant, MIC, minimum inhibitory concentration ( $\mu\text{g/mL}$ ).

**Table S4** Calculated ratios of Au and S, Au and NAC<sub>molar</sub>, Au and NAC<sub>mass</sub> in Au\_NAC NPs.

| Calculated Ratios | Au: NaBH <sub>4</sub> (1:X) |         |         |         | Au: NAC (1:Y) |         |         |         |
|-------------------|-----------------------------|---------|---------|---------|---------------|---------|---------|---------|
|                   | 4                           | 8       | 12      | 16      | 1             | 2       | 4       | 8       |
| Au : S            | 1: 1.09                     | 1: 1.05 | 1: 1.62 | 1: 1.83 | 1: 0.86       | 1: 1.08 | 1: 1.05 | 1: 1.23 |
| Au : Au           | 1: 1.09                     | 1: 1.05 | 1: 1.62 | 1: 1.83 | 1: 0.86       | 1: 1.08 | 1: 1.05 | 1: 1.23 |
| Au : Au           | 1: 0.90                     | 1:0.87  | 1:1.34  | 1:1.52  | 1:0.71        | 1:0.89  | 1:0.87  | 1:1.02  |

Au : NAC<sub>molar</sub>, molar ratio of Au and NAC, Au : NAC<sub>mass</sub>, mass ratio of Au and NAC.



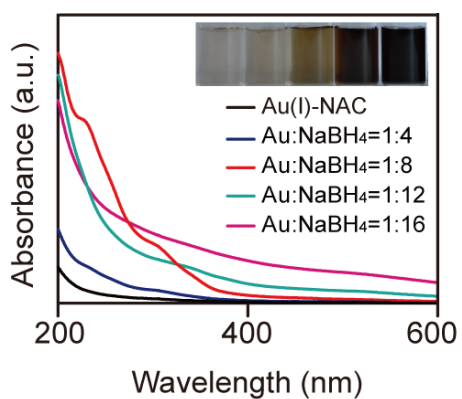

**Figure S1** Photographs of Au(I)-NAC complex and Au<sub>NAC</sub> NPs with different ratio of Au and NaBH<sub>4</sub>.

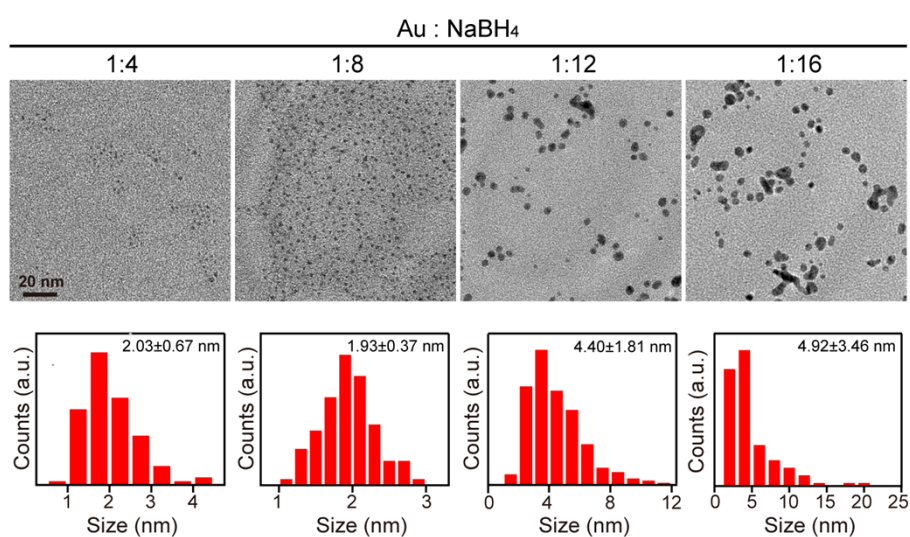

**Figure S2** TEM image of Au<sub>NAC</sub> NPs with different ratio of Au and NaBH<sub>4</sub>.

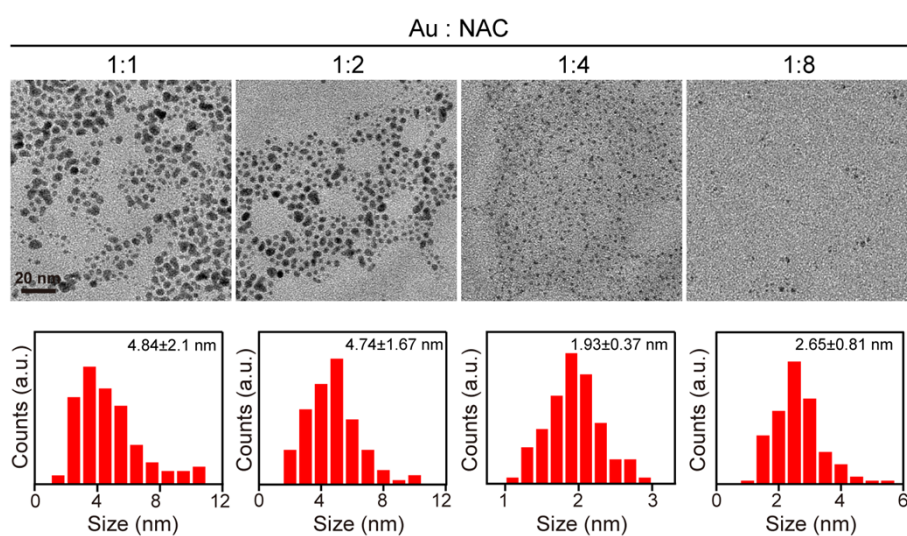

**Figure S3** TEM image of Au<sub>NAC</sub> NPs with different ratio of Au and NAC.

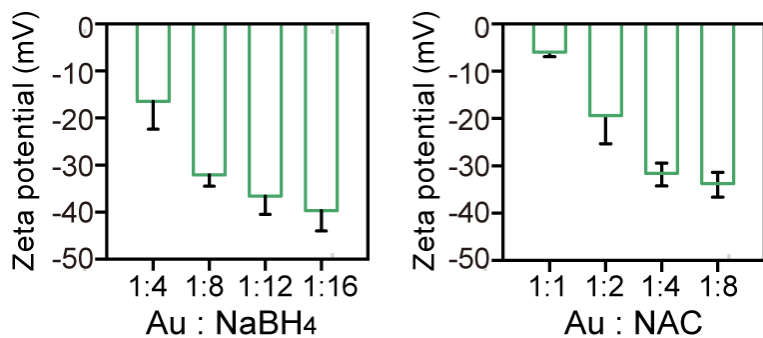

**Figure S4** Zeta potential of Au\_NAC NPs with different ratio of Au and NaBH<sub>4</sub> and different ratio of Au and NAC.

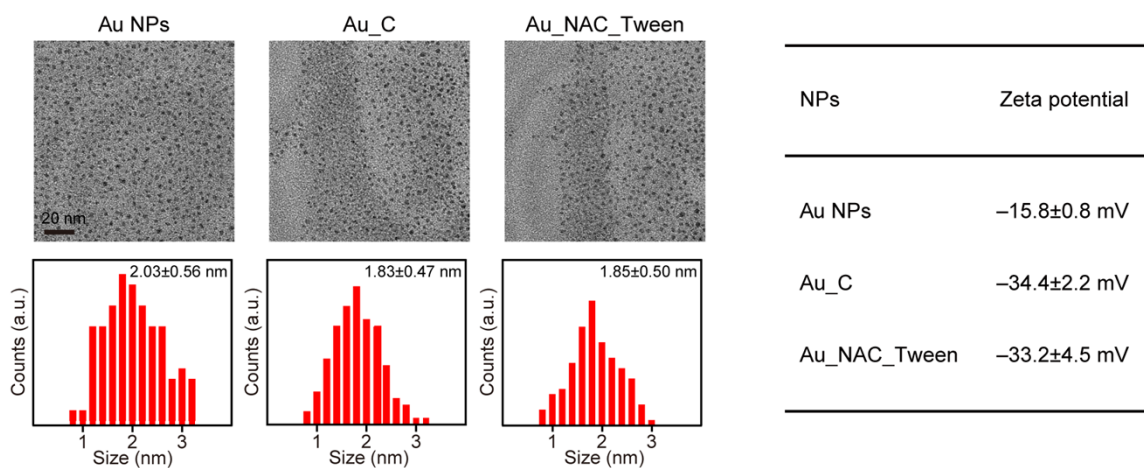

**Figure S5** TEM images, size distribution and zeta potential of Au NPs, Au\_C, and Au\_NAC\_Tween.

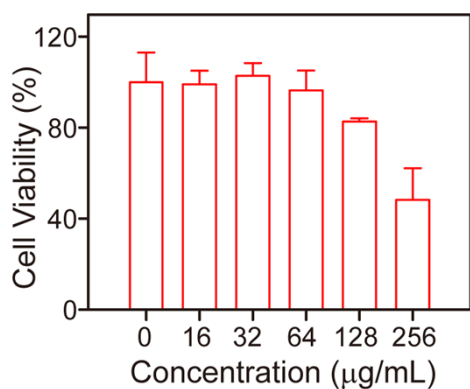

**Figure S6** Cytotoxicity of Au\_NAC on HUVECs.

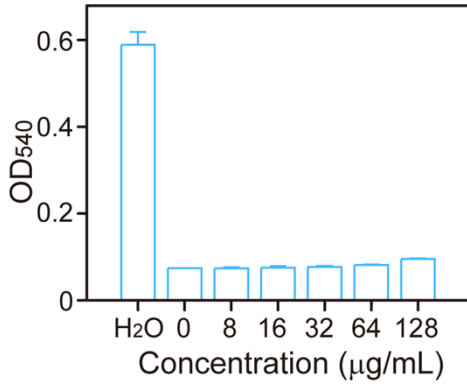

**Figure S7** Hemolysis effects of Au\_NAC.

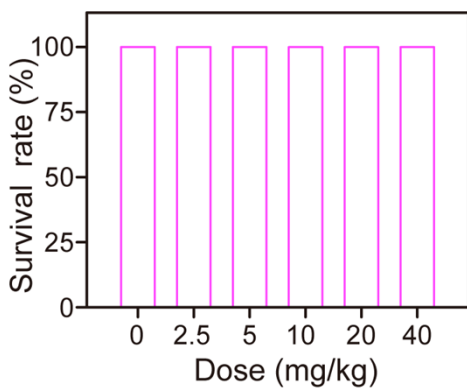

**Figure S8** *In vivo* toxicity of Au\_NAC.

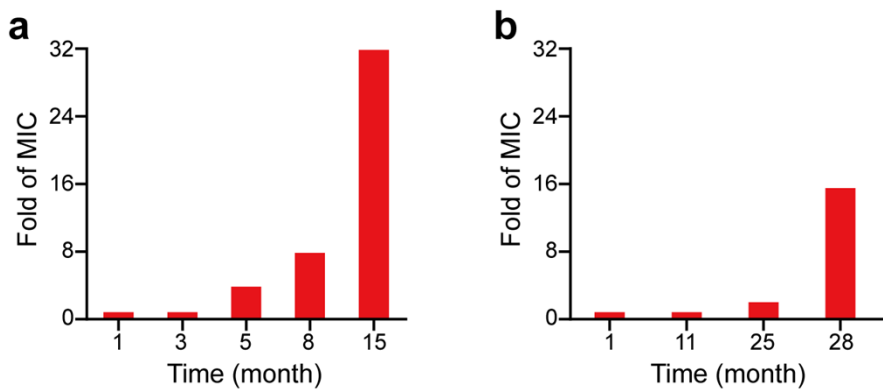

**Figure S9** Stability of Au\_NAC. Fold of MICs of Au\_NAC after stored **a** at 4 °C in liquid condition and **b** at -20 °C in solid condition after lyophilization.

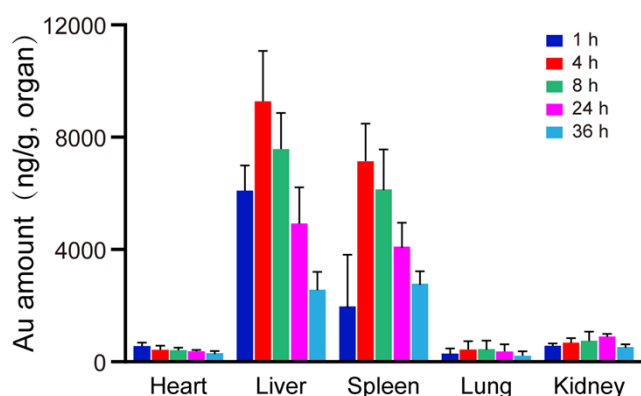

**Figure S10** Quantitative analysis of Au amount per organ after intravenous administration.

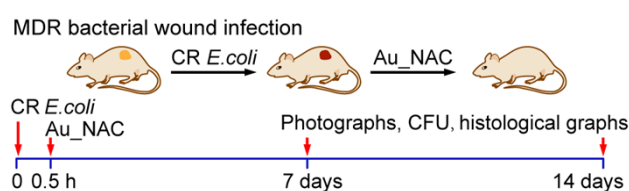

**Figure S11** Scheme of the experimental protocol of MDR bacterial wound infections.

## References

1. Zhao, Y. Y.; Tian, Y.; Cui, Y.; Liu, W. W.; Ma, W. S.; Jiang, X. Y., Small molecule-capped gold nanoparticles as potent antibacterial agents that target Gram-negative bacteria. *J. Am. Chem. Soc.* 2010, 132 (35), 12349-12356.
2. Zhao, Y. Y.; Chen, Z. L.; Chen, Y. F.; Xu, J.; Li, J. H.; Jiang, X. Y., Synergy of non-antibiotic drugs and pyrimidinethiol on gold nanoparticles against superbugs. *J. Am. Chem. Soc.* 2013, 135 (35), 12940-12943.
3. Zhang, J.; Mou, L.; Jiang, X., Hydrogels Incorporating Au@Polydopamine nanoparticles: robust performance for optical sensing. *Anal. Chem.* 2018, 90 (19), 11423-11430.
4. Corthey, G.; Giovanetti, L. J.; Ramallo-Lopez, J. M.; Zelaya, E.; Rubert, A. A.; Benitez, G. A.; Requejo, F. G.; Fonticelli, M. H.; Salvarezza, R. C., Synthesis and characterization of gold@gold(I) - thiomalate core@shell nanoparticles. *ACS Nano* 2010, 4 (6), 3413-3421.
5. CLSI Guidelines (2018) Performance Standards for Antimicrobial Susceptibility Testing. 28th Edition (M100S).
6. Greco, I.; Hummel, B. D.; Vasir, J.; Watts, J. L.; Koch, J.; Hansen, J. E.; Nielsen, H. M.;

Damborg, P.; Hansen, P. R., In vitro ADME properties of two novel antimicrobial peptoid-based compounds as potential agents against canine pyoderma. *Molecules* 2018, 23 (3).

7. Wang, L.; Li, S. X.; Yin, J. X.; Yang, J. C.; Li, Q. Z.; Zheng, W. F.; Liu, S. Q.; Jiang, X. Y., The density of surface coating can contribute to different antibacterial activities of gold nanoparticles. *Nano Lett.* 2020, 20 (7), 5036-5042.
8. Farha, M. A.; Verschoor, C. P.; Bowdish, D.; Brown, E. D., Collapsing the proton motive force to identify synergistic combinations against *Staphylococcus aureus*. *Chem. Biol.* 2013, 20 (9), 1168-78.
9. Zhao, X. H.; Jia, Y. X.; Dong, R. H.; Deng, J. Q.; Tang, H.; Hu, F. P.; Liu, S. Q.; Jiang, X. Y., Bimetallic nanoparticles against multi-drug resistant bacteria. *Chem. Commun.* 2020, 56 (74), 10918-10921.
10. Zhao, X.; Jia, Y.; Li, J.; Dong, R.; Zhang, J.; Ma, C.; Wang, H.; Rui, Y.; Jiang, X., Indole derivative-capped gold nanoparticles as an effective bactericide *in vivo*. *ACS Appl. Mater. Interfaces.* 2018, 10 (35), 29398-29406.
11. Xie, Y.; Liu, Y.; Yang, J.; Liu, Y.; Hu, F.; Zhu, K.; Jiang, X., Gold nanoclusters for targeting methicillin-resistant *Staphylococcus aureus in vivo*. *Angew. Chem. Int. Ed. Engl.* 2018, 57 (15), 3958-3962.
12. Yang, X. L.; Yang, J. C.; Wang, L.; Ran, B.; Jia, Y. X.; Zhang, L. M.; Yang, G.; Shao, H. W.; Jiang, X. Y., Pharmaceutical intermediate-modified gold nanoparticles: against multidrug-resistant bacteria and wound-healing application via an electrospun scaffold. *ACS Nano* 2017, 11 (6), 5737-5745.
